# Supplementary material for: Phylogenomics and species delimitation of the economically important Black Basses (Micropterus)
Source: PubMed Central journal article supplement (PMC9170712; doi:10.1038/s41598-022-11743-2), 2022-06-06
Supplement: 41598_2022_11743_MOESM2_ESM.pdf [file 41598_2022_11743_MOESM2_ESM.pdf]

Supplementary Figures and Tables for:

**Phylogenomics and species delimitation of the economically important Black Basses (*Micropterus*)**

**Daemin Kim, Andrew T. Taylor, and Thomas J. Near**

**Supplementary Figure S2.** Map presenting results of snmf analysis for each sampling location for the Largemouth Bass complex. Maps created using personal R scripts.

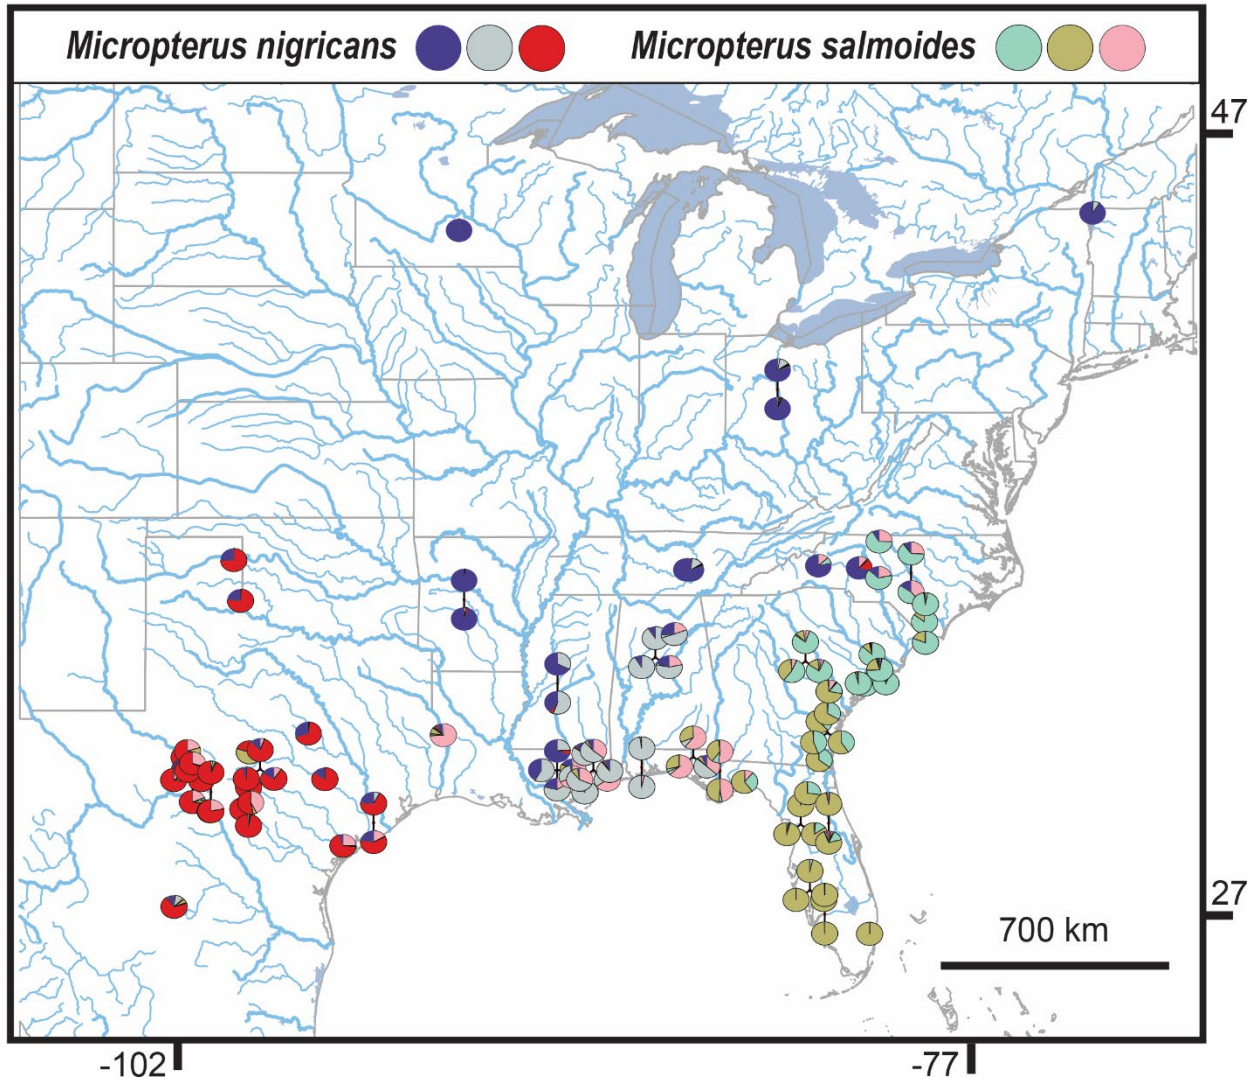

**Supplementary Figure S3. (a)** Migration edges among populations and species of the Spotted Bass complex, inferred from TreeMix analysis. Arrows show relative magnitude and direction of gene flow. **(b)** Fastsimcoal2 analyses results combined from the models ‘Gene-flow Texas2’ and ‘Gene-flow Spotted\_Gulf2’ for the Spotted Bass complex. Phylogenetic tree is trimmed to fit time scales of gene flow. Arrows indicate direction of gene flow. Light blue bars indicate 95% confidence interval (CI) of estimated timing for population split or gene flow events and numbers around light blue bars show a mean and the 95% CI for each event. For details of tested models and parameter estimates, see Supplementary Fig. S4 and Supplementary Table S3.

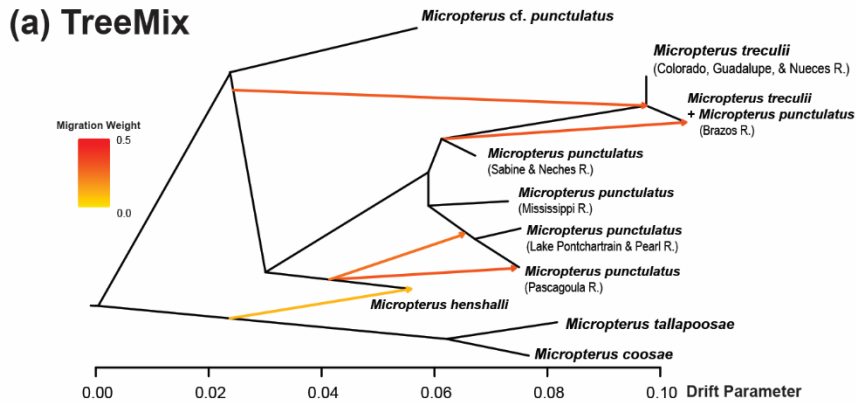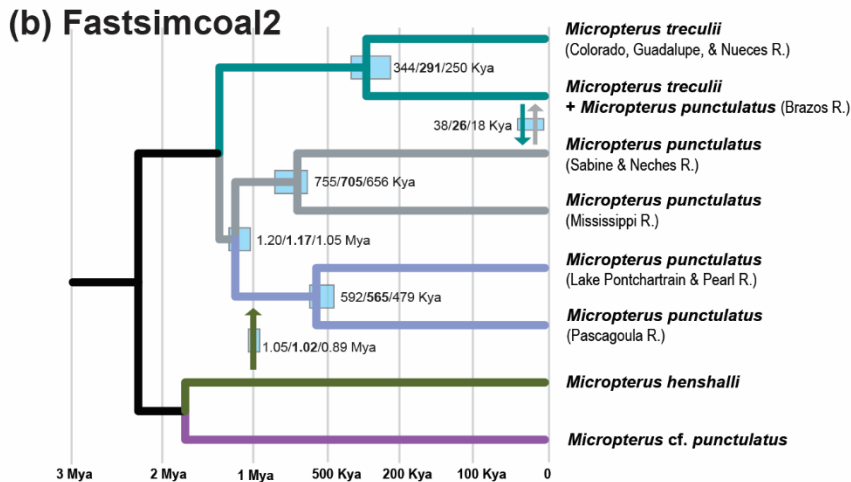

**Supplementary Figure S4.** Hierarchical models tested in Fastsimcoal2 analyses for the Spotted Bass complex and their parameters. Best-fit model for each set of models is highlighted with a red box. The models ‘Gene-flow Texas2’ and ‘Gene-flow Spotted\_Gulf2’ are additionally highlighted with a yellow star. For details of the parameter estimates, see Supplementary Table S3.

**Mpun:** *Micropterus punctulatus* (Mississippi R. Basin)  
**MpunSN:** *Micropterus punctulatus* (Sabine & Neches R.)  
**MpunPP:** *Micropterus punctulatus* (Lake Pontchartrain & Pearl R.)  
**MpunPS:** *Micropterus punctulatus* (Pascagoula R.)  
**Mtre:** *Micropterus freaculi* (Colorado, Guadalupe, & Nueces R.)  
**MtreBZ:** *Micropterus freaculi* & *Micropterus punctulatus* (Brazos R.)  
**Mhen:** *Micropterus henrici*  
**Mcho:** *Micropterus cf. punctulatus* "Choctaw Bass"

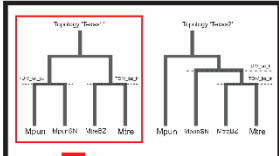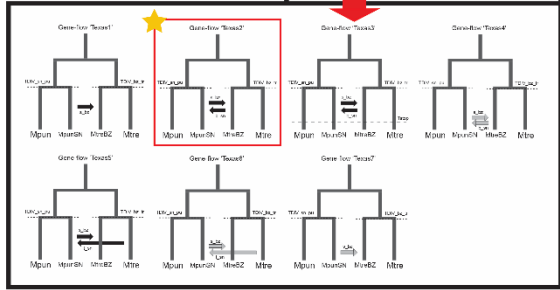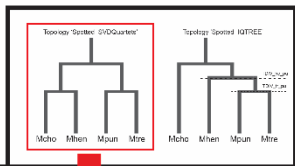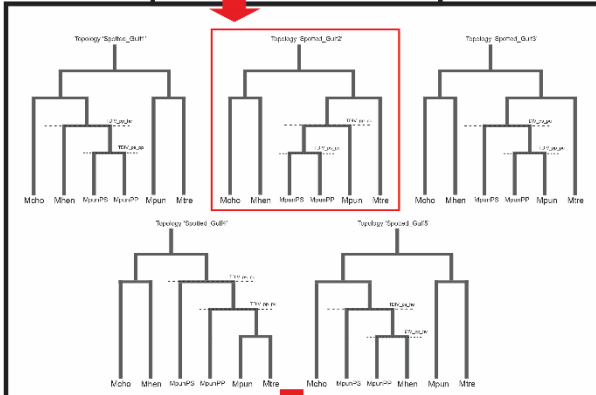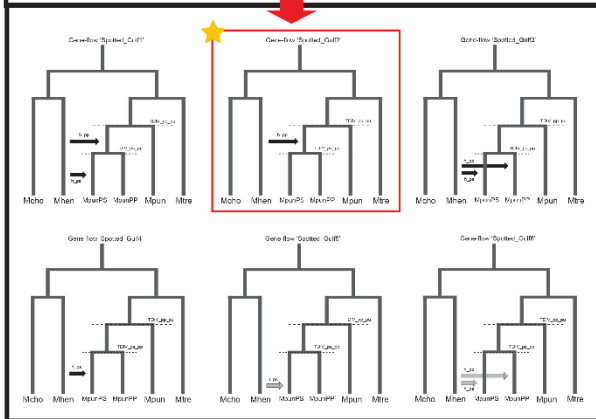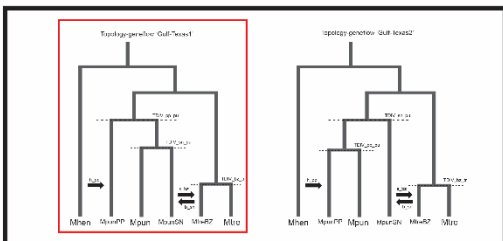

**Supplementary Table S1.** List of specimens used in the present study, GPS coordinates of sampling locations, and voucher and tissue catalog numbers. Specimen names correspond to IQ-TREE phylogeny shown in Supplementary Fig. S1. Museum and tissue collection catalog abbreviations: GMNHTC, Georgia Museum of Natural History; INHS, Illinois Natural History Survey; MMNS, Mississippi Museum of Natural Science; SELU, Southeastern Louisiana University Vertebrate Museum; TCWC, Biodiversity Research and Teaching Collections (formerly Texas Cooperative Wildlife Collection); TNHC, Texas Natural History Collections; UF, University of Florida, Florida Museum of Natural History; UT, University of Tennessee Etnier Ichthyological Collection; YPM, Yale Peabody Museum of Natural History; AT, gift from Andrew Taylor (University of Central Oklahoma); KS, gift from Ben Neely (Kansas Department of Wildlife, Parks, and Tourism); MW, gift from Matthew Wagner (U.S. Fish and Wildlife Service, formerly Mississippi Museum of Natural Science); SCDNR, South Carolina Department of Natural Resources; YFTC, Yale Fish Tissue Collection. NA, not available.

| Specimen                | Species                       | Latitude | Longitude | Voucher        | Tissue     |
|-------------------------|-------------------------------|----------|-----------|----------------|------------|
| M_cahabae_YFTC_35016    | <i>Micropterus cahabae</i>    | 33.43989 | -86.69921 | YPM ICH 033290 | YFTC_35016 |
| M_cahabae_YFTC_35018    | <i>Micropterus cahabae</i>    | 33.43989 | -86.69921 | YPM ICH 033290 | YFTC_35018 |
| M_cahabae_YFTC_35019    | <i>Micropterus cahabae</i>    | 33.43989 | -86.69921 | YPM ICH 033290 | YFTC_35019 |
| M_cahabae_YFTC_32198    | <i>Micropterus cahabae</i>    | 32.91110 | -87.02787 | YPM ICH 031720 | YFTC_32198 |
| M_cahabae_YFTC_32200    | <i>Micropterus cahabae</i>    | 32.91110 | -87.02787 | YPM ICH 031720 | YFTC_32200 |
| M_cahabae_YFTC_32201    | <i>Micropterus cahabae</i>    | 32.91110 | -87.02787 | YPM ICH 031720 | YFTC_32201 |
| M_cataractae_YFTC_13044 | <i>Micropterus cataractae</i> | 32.83909 | -84.42204 | YPM ICH 020670 | YFTC_13044 |
| M_cataractae_UF_237825  | <i>Micropterus cataractae</i> | 30.55246 | -85.17089 | UF 237825      | UF_237825  |
| M_cataractae_AT_BIG186  | <i>Micropterus cataractae</i> | 34.01305 | -84.35917 | NA             | AT_BIG186  |
| M_cataractae_AT_BIG191  | <i>Micropterus cataractae</i> | 34.01305 | -84.35917 | NA             | AT_BIG191  |
| M_cataractae_AT_CHA41   | <i>Micropterus cataractae</i> | 34.56311 | -83.62876 | NA             | AT_CHA41   |

|                                     |                                         |          |           |              |                |
|-------------------------------------|-----------------------------------------|----------|-----------|--------------|----------------|
| M_cataractae_AT_CHA46               | <i>Micropterus cataractae</i>           | 34.56311 | -83.62876 | NA           | AT_CHA46       |
| M_cataractae_AT_CHE8                | <i>Micropterus cataractae</i>           | 34.50422 | -83.96885 | NA           | AT_CHE8        |
| M_cataractae_AT_CHE9                | <i>Micropterus cataractae</i>           | 34.50422 | -83.96885 | NA           | AT_CHE9        |
| M_cataractae_UF_174506              | <i>Micropterus cataractae</i>           | 31.15836 | -84.47909 | UF 174506    | UF_174506      |
| M_cf_coosae_Altamaha_YFTC_19316     | <i>Micropterus cf. coosae</i> Altamaha  | 33.74570 | -83.46190 | GMNHTC 9211  | YFTC_19316     |
| M_cf_coosae_Altamaha_YFTC_19317     | <i>Micropterus cf. coosae</i> Altamaha  | 33.74570 | -83.46190 | GMNHTC 9213  | YFTC_19317     |
| M_cf_coosae_Altamaha_YFTC_19204     | <i>Micropterus cf. coosae</i> Altamaha  | 33.78650 | -83.47390 | GMNHTC 10349 | YFTC_19204     |
| M_cf_coosae_Altamaha_YFTC_19205     | <i>Micropterus cf. coosae</i> Altamaha  | 33.78650 | -83.47390 | GMNHTC 10350 | YFTC_19205     |
| M_cf_coosae_Bartrams_SCDNR_MXX00739 | <i>Micropterus cf. coosae</i> Bartram's | 34.18204 | -83.14680 | NA           | SCDNR_MXX00739 |
| M_cf_coosae_Bartrams_SCDNR_MXX00744 | <i>Micropterus cf. coosae</i> Bartram's | 34.18204 | -83.14680 | NA           | SCDNR_MXX00744 |
| M_cf_coosae_Bartrams_SCDNR_MXX00745 | <i>Micropterus cf. coosae</i> Bartram's | 34.18204 | -83.14680 | NA           | SCDNR_MXX00745 |
| M_cf_coosae_Bartrams_SCDNR_MXX01181 | <i>Micropterus cf. coosae</i> Bartram's | 34.08821 | -82.32096 | NA           | SCDNR_MXX01181 |
| M_cf_coosae_Bartrams_SCDNR_MXX01182 | <i>Micropterus cf. coosae</i> Bartram's | 34.08821 | -82.32096 | NA           | SCDNR_MXX01182 |
| M_cf_coosae_Bartrams_SCDNR_MXX01183 | <i>Micropterus cf. coosae</i> Bartram's | 34.08821 | -82.32096 | NA           | SCDNR_MXX01183 |
| M_cf_coosae_Bartrams_SCDNR_MXX01239 | <i>Micropterus cf. coosae</i> Bartram's | 33.51394 | -81.99637 | NA           | SCDNR_MXX01239 |
| M_cf_coosae_Bartrams_SCDNR_MXX01240 | <i>Micropterus cf. coosae</i> Bartram's | 33.51394 | -81.99637 | NA           | SCDNR_MXX01240 |
| M_cf_coosae_Bartrams_SCDNR_MXX01236 | <i>Micropterus cf. coosae</i> Bartram's | 34.31152 | -82.61862 | NA           | SCDNR_MXX01236 |
| M_cf_coosae_Bartrams_YFTC_19314     | <i>Micropterus cf. coosae</i> Bartram's | 34.03120 | -83.00450 | GMNHTC 10345 | YFTC_19314     |
| M_cf_dolomieu_Little_AT_CS1         | <i>Micropterus cf. dolomieu</i> Little  | 34.29647 | -94.18485 | NA           | AT_CS1         |
| M_cf_dolomieu_Little_AT_CS21        | <i>Micropterus cf. dolomieu</i> Little  | 34.29647 | -94.18485 | NA           | AT_CS21        |
| M_cf_dolomieu_Little_AT_WS1         | <i>Micropterus cf. dolomieu</i> Little  | 34.20877 | -94.05485 | NA           | AT_WS1         |
| M_cf_dolomieu_Little_AT_OUACH009    | <i>Micropterus cf. dolomieu</i> Little  | 34.16870 | -94.91279 | NA           | AT_OUACH009    |
| M_cf_dolomieu_Little_AT_OUACH023    | <i>Micropterus cf. dolomieu</i> Little  | 34.06568 | -94.62309 | NA           | AT_OUACH023    |
| M_cf_dolomieu_Little_AT_LIT017      | <i>Micropterus cf. dolomieu</i> Little  | 34.55663 | -94.94042 | NA           | AT_LIT017      |

|                                |                                          |          |           |                |            |
|--------------------------------|------------------------------------------|----------|-----------|----------------|------------|
| M_cf_dolomieu_Little_AT_UMF046 | <i>Micropterus cf. dolomieu</i> Little   | 34.45999 | -94.63709 | NA             | AT_UMF046  |
| M_cf_dolomieu_Ouachita_AT_CD14 | <i>Micropterus cf. dolomieu</i> Ouachita | 34.39751 | -93.62186 | NA             | AT_CD14    |
| M_cf_dolomieu_Ouachita_AT_SA10 | <i>Micropterus cf. dolomieu</i> Ouachita | 34.61309 | -92.78072 | NA             | AT_SA10    |
| M_cf_dolomieu_Ouachita_AT_SA11 | <i>Micropterus cf. dolomieu</i> Ouachita | 34.61309 | -92.78072 | NA             | AT_SA11    |
| M_cf_dolomieu_Ouachita_AT_SA16 | <i>Micropterus cf. dolomieu</i> Ouachita | 34.61309 | -92.78072 | NA             | AT_SA16    |
| M_cf_dolomieu_Ouachita_AT_LM1  | <i>Micropterus cf. dolomieu</i> Ouachita | 34.30479 | -93.89525 | NA             | AT_LM1     |
| M_cf_dolomieu_Ouachita_AT_LM38 | <i>Micropterus cf. dolomieu</i> Ouachita | 34.10213 | -93.71556 | NA             | AT_LM38    |
| M_cf_dolomieu_Ouachita_AT_OU1  | <i>Micropterus cf. dolomieu</i> Ouachita | 34.61343 | -93.69837 | NA             | AT_OU1     |
| M_cf_dolomieu_Ouachita_AT_OU46 | <i>Micropterus cf. dolomieu</i> Ouachita | 34.57158 | -93.99355 | NA             | AT_OU46    |
| M_cf_punctulatus_YFTC_8912     | <i>Micropterus cf. punctulatus</i>       | 31.12968 | -87.08745 | YPM ICH 016101 | YFTC_8912  |
| M_cf_punctulatus_YFTC_2309     | <i>Micropterus cf. punctulatus</i>       | 30.92468 | -86.55987 | NA             | YFTC_2309  |
| M_cf_punctulatus_YFTC_8913     | <i>Micropterus cf. punctulatus</i>       | 31.12968 | -87.08745 | YPM ICH 016101 | YFTC_8913  |
| M_cf_punctulatus_YFTC_31942    | <i>Micropterus cf. punctulatus</i>       | 30.72443 | -86.79291 | YPM ICH 031429 | YFTC_31942 |
| M_cf_punctulatus_UF_185450     | <i>Micropterus cf. punctulatus</i>       | 30.98400 | -87.23500 | UF 185450      | UF_185450  |
| M_cf_punctulatus_YFTC_8823     | <i>Micropterus cf. punctulatus</i>       | 30.92538 | -86.55927 | YPM ICH 016043 | YFTC_8823  |
| M_chattahoochae_YFTC_19297     | <i>Micropterus chattahoochae</i>         | 33.34745 | -85.23891 | GMNHTC 4893    | YFTC_19297 |
| M_chattahoochae_YFTC_19298     | <i>Micropterus chattahoochae</i>         | 33.34745 | -85.23891 | GMNHTC 4894    | YFTC_19298 |
| M_chattahoochae_YFTC_19312     | <i>Micropterus chattahoochae</i>         | 34.62737 | -83.64192 | GMNHTC 9217    | YFTC_19312 |
| M_chattahoochae_YFTC_32349     | <i>Micropterus chattahoochae</i>         | 33.39165 | -85.16953 | YPM ICH 031731 | YFTC_32349 |
| M_chattahoochae_UF_166461      | <i>Micropterus chattahoochae</i>         | 33.30528 | -85.18722 | UF 166461      | UF_166461  |
| M_coosae_UF_165881             | <i>Micropterus coosae</i>                | 33.62528 | -86.04806 | UF 165881      | UF_165881  |
| M_coosae_YFTC_32313            | <i>Micropterus coosae</i>                | 33.72512 | -85.60121 | YPM ICH 031375 | YFTC_32313 |
| M_coosae_YFTC_32314            | <i>Micropterus coosae</i>                | 33.72512 | -85.60121 | YPM ICH 031375 | YFTC_32314 |
| M_coosae_YFTC_15870            | <i>Micropterus coosae</i>                | 34.41596 | -84.36685 | YPM ICH 021737 | YFTC_15870 |

|                                  |                             |          |           |                |             |
|----------------------------------|-----------------------------|----------|-----------|----------------|-------------|
| M_coosae_YFTC_19287              | <i>Micropterus coosae</i>   | 34.70403 | -84.53940 | GMNHTC 2112    | YFTC_19287  |
| M_coosae_YFTC_19293              | <i>Micropterus coosae</i>   | 34.98887 | -84.63475 | GMNHTC 3910    | YFTC_19293  |
| M_coosae_YFTC_19294              | <i>Micropterus coosae</i>   | 34.88924 | -84.82729 | GMNHTC 3925    | YFTC_19294  |
| M_coosae_YFTC_19296              | <i>Micropterus coosae</i>   | 34.02841 | -85.61439 | GMNHTC 3953    | YFTC_19296  |
| M_dolomieu_X_M_velox_AT_GRSPB031 | <i>Micropterus dolomieu</i> | 36.23398 | -92.92202 | NA             | AT_GRSPB031 |
| M_dolomieu_X_M_velox_AT_GRSPB032 | <i>Micropterus dolomieu</i> | 36.23398 | -92.92202 | NA             | AT_GRSPB032 |
| M_dolomieu_X_M_velox_AT_GRSPB041 | <i>Micropterus dolomieu</i> | 35.87345 | -93.90916 | NA             | AT_GRSPB041 |
| M_dolomieu_X_M_velox_AT_GRSPB039 | <i>Micropterus dolomieu</i> | 35.87345 | -93.90916 | NA             | AT_GRSPB039 |
| M_dolomieu_X_M_velox_YFTC_10483  | <i>Micropterus dolomieu</i> | 36.61785 | -90.83988 | YPM ICH 018619 | YFTC_10483  |
| M_dolomieu_X_M_velox_YFTC_10254  | <i>Micropterus dolomieu</i> | 37.60104 | -92.23398 | YPM ICH 018546 | YFTC_10254  |
| M_dolomieu_X_M_velox_YFTC_10280  | <i>Micropterus dolomieu</i> | 37.50395 | -92.22902 | YPM ICH 018534 | YFTC_10280  |
| M_dolomieu_X_M_velox_YFTC_10295  | <i>Micropterus dolomieu</i> | 37.50395 | -92.22902 | YPM ICH 018534 | YFTC_10295  |
| M_dolomieu_YFTC_1639             | <i>Micropterus dolomieu</i> | 41.35553 | -88.40391 | NA             | YFTC_1639   |
| M_dolomieu_YFTC_1640             | <i>Micropterus dolomieu</i> | 41.35553 | -88.40391 | NA             | YFTC_1640   |
| M_dolomieu_YFTC_1623             | <i>Micropterus dolomieu</i> | 41.73703 | -89.57386 | INHS 52554     | YFTC_1623   |
| M_dolomieu_YFTC_6336             | <i>Micropterus dolomieu</i> | 36.69210 | -86.34727 | UT 90.3719     | YFTC_6336   |
| M_dolomieu_YFTC_6337             | <i>Micropterus dolomieu</i> | 36.69210 | -86.34727 | UT 90.3719     | YFTC_6337   |
| M_dolomieu_YFTC_6428             | <i>Micropterus dolomieu</i> | 37.26647 | -85.58145 | UT 90.3739     | YFTC_6428   |
| M_dolomieu_YFTC_6432             | <i>Micropterus dolomieu</i> | 37.26647 | -85.58145 | UT 90.3739     | YFTC_6432   |
| M_dolomieu_YFTC_6435             | <i>Micropterus dolomieu</i> | 37.26647 | -85.58145 | UT 90.3739     | YFTC_6435   |
| M_dolomieu_YFTC_3324             | <i>Micropterus dolomieu</i> | 35.76600 | -83.85654 | NA             | YFTC_3324   |
| M_dolomieu_UF_174456             | <i>Micropterus dolomieu</i> | 44.44423 | -93.19098 | UF 174456      | UF_174456   |
| M_dolomieu_YFTC_35411            | <i>Micropterus dolomieu</i> | 35.43880 | -79.99930 | YPM ICH 033511 | YFTC_35411  |
| M_dolomieu_YFTC_Neo34            | <i>Micropterus dolomieu</i> | NA       | NA        | NA             | YFTC_Neo34  |

|                                 |                             |          |           |                |            |
|---------------------------------|-----------------------------|----------|-----------|----------------|------------|
| M_dolomieu_YFTC_Neo35           | <i>Micropterus dolomieu</i> | NA       | NA        | NA             | YFTC_Neo35 |
| M_dolomieu_YFTC_Neo36           | <i>Micropterus dolomieu</i> | NA       | NA        | NA             | YFTC_Neo36 |
| M_dolomieu_YFTC_Neo52           | <i>Micropterus dolomieu</i> | NA       | NA        | NA             | YFTC_Neo52 |
| M_dolomieu_YFTC_Neo53           | <i>Micropterus dolomieu</i> | NA       | NA        | NA             | YFTC_Neo53 |
| M_dolomieu_X_M_velox_YFTC_10373 | <i>Micropterus dolomieu</i> | 36.75436 | -92.15351 | YPM ICH 020379 | YFTC_10373 |
| M_dolomieu_YFTC_11144           | <i>Micropterus dolomieu</i> | 40.38286 | -82.22906 | YPM ICH 017292 | YFTC_11144 |
| M_dolomieu_X_M_velox_YFTC_10351 | <i>Micropterus dolomieu</i> | 37.69276 | -92.95593 | YPM ICH 020935 | YFTC_10351 |
| M_dolomieu_YFTC_6556            | <i>Micropterus dolomieu</i> | 35.57126 | -85.71177 | UT 90.3730     | YFTC_6556  |
| M_dolomieu_YFTC_6562            | <i>Micropterus dolomieu</i> | 35.57126 | -85.71177 | UT 90.3756     | YFTC_6562  |
| M_dolomieu_YFTC_3325            | <i>Micropterus dolomieu</i> | 35.76600 | -83.85654 | NA             | YFTC_3325  |
| M_dolomieu_YFTC_3326            | <i>Micropterus dolomieu</i> | 35.76600 | -83.85654 | NA             | YFTC_3326  |
| M_dolomieu_YFTC_3327            | <i>Micropterus dolomieu</i> | 35.76600 | -83.85654 | NA             | YFTC_3327  |
| M_dolomieu_YFTC_3328            | <i>Micropterus dolomieu</i> | 35.76600 | -83.85654 | NA             | YFTC_3328  |
| M_dolomieu_YFTC_26711           | <i>Micropterus dolomieu</i> | 36.18016 | -82.53411 | YPM ICH 026300 | YFTC_26711 |
| M_dolomieu_YFTC_26712           | <i>Micropterus dolomieu</i> | 36.18016 | -82.53411 | YPM ICH 026300 | YFTC_26712 |
| M_dolomieu_YFTC_12011           | <i>Micropterus dolomieu</i> | 36.82744 | -81.92425 | YPM ICH 018799 | YFTC_12011 |
| M_dolomieu_YFTC_38188           | <i>Micropterus dolomieu</i> | 38.36938 | -77.79953 | YPM ICH 033644 | YFTC_38188 |
| M_dolomieu_YFTC_38190           | <i>Micropterus dolomieu</i> | 38.36938 | -77.79953 | YPM ICH 033644 | YFTC_38190 |
| M_dolomieu_YFTC_18711           | <i>Micropterus dolomieu</i> | 44.36950 | -72.73200 | YPM ICH 022033 | YFTC_18711 |
| M_dolomieu_YFTC_21986           | <i>Micropterus dolomieu</i> | 44.88170 | -73.23220 | YPM ICH 030968 | YFTC_21986 |
| M_dolomieu_YFTC_21993           | <i>Micropterus dolomieu</i> | 44.88170 | -73.23220 | YPM ICH 030968 | YFTC_21993 |
| M_dolomieu_YFTC_21997           | <i>Micropterus dolomieu</i> | 44.88170 | -73.23220 | YPM ICH 030968 | YFTC_21997 |
| M_dolomieu_YFTC_21998           | <i>Micropterus dolomieu</i> | 44.88170 | -73.23220 | YPM ICH 030968 | YFTC_21998 |
| M_dolomieu_YFTC_27266           | <i>Micropterus dolomieu</i> | 44.56060 | -73.31480 | YPM ICH 028983 | YFTC_27266 |



|                                        |                              |          |           |                |            |
|----------------------------------------|------------------------------|----------|-----------|----------------|------------|
| M_dolomieu_AT_MDO23                    | <i>Micropterus dolomieu</i>  | 46.63662 | -90.92231 | NA             | AT_MDO23   |
| M_dolomieu_AT_MDO22                    | <i>Micropterus dolomieu</i>  | 46.63662 | -90.92231 | NA             | AT_MDO22   |
| M_dolomieu_AT_MDO24                    | <i>Micropterus dolomieu</i>  | 46.63662 | -90.92231 | NA             | AT_MDO24   |
| M_dolomieu_YFTC_9943                   | <i>Micropterus dolomieu</i>  | 38.49931 | -81.06567 | YPM ICH 018372 | YFTC_9943  |
| M_dolomieu_YFTC_9944                   | <i>Micropterus dolomieu</i>  | 38.49931 | -81.06567 | YPM ICH 018372 | YFTC_9944  |
| M_dolomieu_YFTC_38123                  | <i>Micropterus dolomieu</i>  | 38.92410 | -78.84125 | YPM ICH 033685 | YFTC_38123 |
| M_henshalli_X_M_punctulatus_YFTC_13050 | <i>Micropterus henshalli</i> | 32.83909 | -84.42204 | YPM ICH 020669 | YFTC_13050 |
| M_henshalli_X_M_punctulatus_YFTC_6707  | <i>Micropterus henshalli</i> | 34.99047 | -84.77559 | UT 90.3827     | YFTC_6707  |
| M_henshalli_YFTC_8951                  | <i>Micropterus henshalli</i> | 31.99653 | -87.06859 | YPM ICH 018698 | YFTC_8951  |
| M_henshalli_YFTC_8952                  | <i>Micropterus henshalli</i> | 31.99653 | -87.06859 | YPM ICH 018698 | YFTC_8952  |
| M_henshalli_YFTC_9011                  | <i>Micropterus henshalli</i> | 32.77440 | -87.27367 | YPM ICH 018352 | YFTC_9011  |
| M_henshalli_YFTC_19309                 | <i>Micropterus henshalli</i> | 34.67817 | -83.68524 | GMNHTC 9212    | YFTC_19309 |
| M_henshalli_YFTC_6708                  | <i>Micropterus henshalli</i> | 34.99047 | -84.77559 | UT 90.3827     | YFTC_6708  |
| M_henshalli_YFTC_35017                 | <i>Micropterus henshalli</i> | 33.43989 | -86.69921 | YPM ICH 033289 | YFTC_35017 |
| M_henshalli_YFTC_32226                 | <i>Micropterus henshalli</i> | 33.91751 | -86.81700 | YPM ICH 031737 | YFTC_32226 |
| M_henshalli_YFTC_10920                 | <i>Micropterus henshalli</i> | 34.28470 | -87.39965 | YPM ICH 018576 | YFTC_10920 |
| M_henshalli_YFTC_13108                 | <i>Micropterus henshalli</i> | 33.06649 | -85.88009 | YPM ICH 021060 | YFTC_13108 |
| M_henshalli_YFTC_10807                 | <i>Micropterus henshalli</i> | 33.79018 | -88.31517 | YPM ICH 020447 | YFTC_10807 |
| M_henshalli_YFTC_10796                 | <i>Micropterus henshalli</i> | 33.79018 | -88.31517 | YPM ICH 020447 | YFTC_10796 |
| M_nigricans_YFTC_36346                 | <i>Micropterus nigricans</i> | 33.98471 | -86.42481 | YPM ICH 031988 | YFTC_36346 |
| M_nigricans_YFTC_36238                 | <i>Micropterus nigricans</i> | 33.37925 | -87.01844 | YPM ICH 032190 | YFTC_36238 |
| M_nigricans_YFTC_36239                 | <i>Micropterus nigricans</i> | 33.37925 | -87.01844 | YPM ICH 032190 | YFTC_36239 |
| M_nigricans_YFTC_36240                 | <i>Micropterus nigricans</i> | 33.37925 | -87.01844 | YPM ICH 032190 | YFTC_36240 |
| M_nigricans_YFTC_10692                 | <i>Micropterus nigricans</i> | 34.87406 | -93.03207 | YPM ICH 017507 | YFTC_10692 |

|                        |                              |          |           |                |            |
|------------------------|------------------------------|----------|-----------|----------------|------------|
| M_nigricans_YFTC_10693 | <i>Micropterus nigricans</i> | 34.87406 | -93.03207 | YPM ICH 017507 | YFTC_10693 |
| M_nigricans_YFTC_5725  | <i>Micropterus nigricans</i> | 35.64413 | -85.89994 | UT 90.3664     | YFTC_5725  |
| M_nigricans_YFTC_31963 | <i>Micropterus nigricans</i> | 30.52303 | -87.44564 | YPM ICH 031634 | YFTC_31963 |
| M_nigricans_YFTC_31964 | <i>Micropterus nigricans</i> | 30.52303 | -87.44564 | YPM ICH 031634 | YFTC_31964 |
| M_nigricans_YFTC_31965 | <i>Micropterus nigricans</i> | 30.52303 | -87.44564 | YPM ICH 031634 | YFTC_31965 |
| M_nigricans_YFTC_31966 | <i>Micropterus nigricans</i> | 30.52303 | -87.44564 | YPM ICH 031634 | YFTC_31966 |
| M_nigricans_YFTC_31967 | <i>Micropterus nigricans</i> | 30.52303 | -87.44564 | YPM ICH 031634 | YFTC_31967 |
| M_nigricans_YFTC_31968 | <i>Micropterus nigricans</i> | 30.52303 | -87.44564 | YPM ICH 031634 | YFTC_31968 |
| M_nigricans_YFTC_31969 | <i>Micropterus nigricans</i> | 30.52303 | -87.44564 | YPM ICH 031634 | YFTC_31969 |
| M_nigricans_MW_C3      | <i>Micropterus nigricans</i> | 30.45580 | -90.10470 | NA             | MW_C3      |
| M_nigricans_MW_C4      | <i>Micropterus nigricans</i> | 30.45580 | -90.10470 | NA             | MW_C4      |
| M_nigricans_MW_C6      | <i>Micropterus nigricans</i> | 30.45580 | -90.10470 | NA             | MW_C6      |
| M_nigricans_MW_C7      | <i>Micropterus nigricans</i> | 30.45580 | -90.10470 | NA             | MW_C7      |
| M_nigricans_MW_C8      | <i>Micropterus nigricans</i> | 30.45580 | -90.10470 | NA             | MW_C8      |
| M_nigricans_YFTC_38488 | <i>Micropterus nigricans</i> | 41.43296 | -70.66612 | YPM ICH 033700 | YFTC_38488 |
| M_nigricans_UF_174457  | <i>Micropterus nigricans</i> | 44.44423 | -93.19098 | UF 174457      | UF_174457  |
| M_nigricans_MW_E9      | <i>Micropterus nigricans</i> | 32.70774 | -90.09378 | NA             | MW_E9      |
| M_nigricans_MW_F1      | <i>Micropterus nigricans</i> | 32.70774 | -90.09378 | NA             | MW_F1      |
| M_nigricans_MW_F2      | <i>Micropterus nigricans</i> | 32.70774 | -90.09378 | NA             | MW_F2      |
| M_nigricans_MW_F3      | <i>Micropterus nigricans</i> | 32.70774 | -90.09378 | NA             | MW_F3      |
| M_nigricans_MW_F4      | <i>Micropterus nigricans</i> | 32.70774 | -90.09378 | NA             | MW_F4      |
| M_nigricans_MW_F5      | <i>Micropterus nigricans</i> | 32.70774 | -90.09378 | NA             | MW_F5      |
| M_nigricans_YFTC_32009 | <i>Micropterus nigricans</i> | 30.45973 | -88.96561 | YPM ICH 031631 | YFTC_32009 |
| M_nigricans_YFTC_32010 | <i>Micropterus nigricans</i> | 30.45973 | -88.96561 | YPM ICH 031631 | YFTC_32010 |

|                           |                              |          |            |                |               |
|---------------------------|------------------------------|----------|------------|----------------|---------------|
| M_nigricans_YFTC_32011    | <i>Micropterus nigricans</i> | 30.45973 | -88.96561  | YPM ICH 031631 | YFTC_32011    |
| M_nigricans_YFTC_31992    | <i>Micropterus nigricans</i> | 30.43636 | -88.45230  | YPM ICH 031662 | YFTC_31992    |
| M_nigricans_MW_P10        | <i>Micropterus nigricans</i> | 30.61002 | -88.59009  | NA             | MW_P10        |
| M_nigricans_MW_P2         | <i>Micropterus nigricans</i> | 30.61002 | -88.59009  | NA             | MW_P2         |
| M_nigricans_MW_P4         | <i>Micropterus nigricans</i> | 30.61002 | -88.59009  | NA             | MW_P4         |
| M_nigricans_MW_P6         | <i>Micropterus nigricans</i> | 30.61002 | -88.59009  | NA             | MW_P6         |
| M_nigricans_MW_P7         | <i>Micropterus nigricans</i> | 30.61002 | -88.59009  | NA             | MW_P7         |
| M_nigricans_MW_P8         | <i>Micropterus nigricans</i> | 30.61002 | -88.59009  | NA             | MW_P8         |
| M_nigricans_YFTC_32029    | <i>Micropterus nigricans</i> | 30.28007 | -89.63077  | YPM ICH 031513 | YFTC_32029    |
| M_nigricans_YFTC_32023    | <i>Micropterus nigricans</i> | 30.37783 | -89.23148  | YPM ICH 031437 | YFTC_32023    |
| M_nigricans_YFTC_32024    | <i>Micropterus nigricans</i> | 30.37783 | -89.23148  | YPM ICH 031437 | YFTC_32024    |
| M_nigricans_TNHC_2566     | <i>Micropterus nigricans</i> | 26.91630 | -102.15560 | TNHC 26695     | TNHC_2566     |
| M_nigricans_YFTC_10777    | <i>Micropterus nigricans</i> | 32.77242 | -89.41858  | YPM ICH 018888 | YFTC_10777    |
| M_nigricans_TCWC_17560-06 | <i>Micropterus nigricans</i> | 29.39166 | -101.01980 | TCWC 17560-06  | TCWC_17560-06 |
| M_nigricans_TCWC_17549-04 | <i>Micropterus nigricans</i> | 30.91892 | -99.78395  | TCWC 17549-04  | TCWC_17549-04 |
| M_nigricans_YFTC_13599    | <i>Micropterus nigricans</i> | 40.32225 | -83.17499  | NA             | YFTC_13599    |
| M_nigricans_YFTC_13603    | <i>Micropterus nigricans</i> | 40.32225 | -83.17499  | NA             | YFTC_13603    |
| M_nigricans_YFTC_36170    | <i>Micropterus nigricans</i> | 35.64744 | -86.04372  | YPM ICH 031907 | YFTC_36170    |
| M_nigricans_TNHC_1895     | <i>Micropterus nigricans</i> | 31.40776 | -97.93404  | TNHC 65632     | TNHC_1895     |
| M_nigricans_TNHC_948      | <i>Micropterus nigricans</i> | 35.90240 | -100.27740 | TNHC 59372     | TNHC_948      |
| M_nigricans_TNHC_376      | <i>Micropterus nigricans</i> | 29.09360 | -95.87830  | TNHC 47470     | TNHC_376      |
| M_nigricans_TNHC_377      | <i>Micropterus nigricans</i> | 29.09360 | -95.87830  | TNHC 47470     | TNHC_377      |
| M_nigricans_TNHC_310      | <i>Micropterus nigricans</i> | 30.22257 | -97.40945  | TNHC 47933     | TNHC_310      |
| M_nigricans_TNHC_392      | <i>Micropterus nigricans</i> | 30.48120 | -99.44710  | TNHC 47343     | TNHC_392      |

|                                      |                              |          |            |                |            |
|--------------------------------------|------------------------------|----------|------------|----------------|------------|
| M_nigricans_TNHC_395                 | <i>Micropterus nigricans</i> | 30.48120 | -99.44710  | TNHC 47343     | TNHC_395   |
| M_nigricans_TNHC_398                 | <i>Micropterus nigricans</i> | 30.48120 | -99.44710  | TNHC 47343     | TNHC_398   |
| M_nigricans_TNHC_580                 | <i>Micropterus nigricans</i> | 29.89439 | -100.99546 | TNHC 55481     | TNHC_580   |
| M_nigricans_TNHC_581                 | <i>Micropterus nigricans</i> | 29.89439 | -100.99546 | TNHC 55481     | TNHC_581   |
| M_nigricans_TNHC_574                 | <i>Micropterus nigricans</i> | 29.51405 | -99.81174  | TNHC 55169     | TNHC_574   |
| M_nigricans_TNHC_575                 | <i>Micropterus nigricans</i> | 29.51405 | -99.81174  | TNHC 55169     | TNHC_575   |
| M_nigricans_TNHC_679                 | <i>Micropterus nigricans</i> | 29.61613 | -99.74451  | TNHC 56829     | TNHC_679   |
| M_nigricans_TNHC_1007                | <i>Micropterus nigricans</i> | 28.49660 | -96.84360  | TNHC 61120     | TNHC_1007  |
| M_nigricans_TNHC_570                 | <i>Micropterus nigricans</i> | 29.44319 | -99.99377  | TNHC 55109     | TNHC_570   |
| M_nigricans_TNHC_1606                | <i>Micropterus nigricans</i> | 30.13040 | -101.57430 | TNHC 65057     | TNHC_1606  |
| M_nigricans_TNHC_1616                | <i>Micropterus nigricans</i> | 30.13040 | -101.57430 | TNHC 65057     | TNHC_1616  |
| M_nigricans_TNHC_1620                | <i>Micropterus nigricans</i> | 30.13040 | -101.57430 | TNHC 64934     | TNHC_1620  |
| M_nigricans_TNHC_1643                | <i>Micropterus nigricans</i> | 30.44240 | -101.72030 | TNHC 64928     | TNHC_1643  |
| M_nigricans_TNHC_1649                | <i>Micropterus nigricans</i> | 30.45060 | -101.73110 | TNHC 65071     | TNHC_1649  |
| M_nigricans_TNHC_1650                | <i>Micropterus nigricans</i> | 30.45060 | -101.73110 | TNHC 65071     | TNHC_1650  |
| M_nigricans_TNHC_1651                | <i>Micropterus nigricans</i> | 30.45060 | -101.73110 | TNHC 65071     | TNHC_1651  |
| M_nigricans_TNHC_1667                | <i>Micropterus nigricans</i> | 30.46920 | -101.80270 | TNHC 65115     | TNHC_1667  |
| M_nigricans_TNHC_1677                | <i>Micropterus nigricans</i> | 30.46060 | -101.82510 | TNHC 65172     | TNHC_1677  |
| M_nigricans_TNHC_966                 | <i>Micropterus nigricans</i> | 30.78860 | -101.83540 | TNHC 62131     | TNHC_966   |
| M_nigricans_TNHC_928                 | <i>Micropterus nigricans</i> | 34.84830 | -100.06330 | TNHC 59293     | TNHC_928   |
| M_nigricans_YFTC_38151               | <i>Micropterus nigricans</i> | 38.76609 | -77.97687  | YPM ICH 033630 | YFTC_38151 |
| M_nigricans_X_M_salmoides_YFTC_38184 | <i>Micropterus nigricans</i> | 38.36938 | -77.79953  | YPM ICH 033643 | YFTC_38184 |
| M_nigricans_X_M_salmoides_YFTC_38185 | <i>Micropterus nigricans</i> | 38.36938 | -77.79953  | YPM ICH 033643 | YFTC_38185 |
| M_nigricans_X_M_salmoides_YFTC_38186 | <i>Micropterus nigricans</i> | 38.36938 | -77.79953  | YPM ICH 033643 | YFTC_38186 |

|                                      |                                |          |           |                |            |
|--------------------------------------|--------------------------------|----------|-----------|----------------|------------|
| M_nigricans_X_M_salmoides_YFTC_38189 | <i>Micropterus nigricans</i>   | 38.36938 | -77.79953 | YPM ICH 033643 | YFTC_38189 |
| M_nigricans_X_M_salmoides_YFTC_38319 | <i>Micropterus nigricans</i>   | 38.01856 | -77.28130 | YPM ICH 033743 | YFTC_38319 |
| M_nigricans_X_M_salmoides_YFTC_38320 | <i>Micropterus nigricans</i>   | 38.01856 | -77.28130 | YPM ICH 033743 | YFTC_38320 |
| M_nigricans_X_M_salmoides_YFTC_38353 | <i>Micropterus nigricans</i>   | 37.75965 | -77.61236 | YPM ICH 033580 | YFTC_38353 |
| M_nigricans_X_M_salmoides_YFTC_38373 | <i>Micropterus nigricans</i>   | 37.75965 | -77.61236 | YPM ICH 033639 | YFTC_38373 |
| M_nigricans_YFTC_38386               | <i>Micropterus nigricans</i>   | 44.89468 | -73.26783 | YPM ICH 033918 | YFTC_38386 |
| M_notius_YFTC_31843                  | <i>Micropterus notius</i>      | 30.14764 | -83.96900 | YPM ICH 031549 | YFTC_31843 |
| M_notius_YFTC_31845                  | <i>Micropterus notius</i>      | 30.14764 | -83.96900 | YPM ICH 031549 | YFTC_31845 |
| M_notius_YFTC_31846                  | <i>Micropterus notius</i>      | 30.14764 | -83.96900 | YPM ICH 031549 | YFTC_31846 |
| M_notius_YFTC_31847                  | <i>Micropterus notius</i>      | 30.14764 | -83.96900 | YPM ICH 031549 | YFTC_31847 |
| M_notius_YFTC_31850                  | <i>Micropterus notius</i>      | 30.14764 | -83.96900 | YPM ICH 031549 | YFTC_31850 |
| M_notius_YFTC_31851                  | <i>Micropterus notius</i>      | 30.14764 | -83.96900 | YPM ICH 031549 | YFTC_31851 |
| M_notius_YFTC_31852                  | <i>Micropterus notius</i>      | 30.14764 | -83.96900 | YPM ICH 031549 | YFTC_31852 |
| M_notius_YFTC_31853                  | <i>Micropterus notius</i>      | 30.14764 | -83.96900 | YPM ICH 031549 | YFTC_31853 |
| M_notius_YFTC_31854                  | <i>Micropterus notius</i>      | 30.14764 | -83.96900 | YPM ICH 031549 | YFTC_31854 |
| M_notius_UF_181353                   | <i>Micropterus notius</i>      | 29.86928 | -82.74431 | UF 181353      | UF_181353  |
| M_notius_UF_170650                   | <i>Micropterus notius</i>      | 30.20278 | -83.96917 | UF 170650      | UF_170650  |
| M_notius_UF_183662                   | <i>Micropterus notius</i>      | 30.20278 | -83.96917 | UF 183662      | UF_183662  |
| M_notius_YFTC_31807                  | <i>Micropterus notius</i>      | 29.86897 | -82.74376 | YPM ICH 031418 | YFTC_31807 |
| M_punctulatus_YFTC_13075             | <i>Micropterus punctulatus</i> | 32.35522 | -85.09525 | YPM ICH 020718 | YFTC_13075 |
| M_punctulatus_YFTC_2811              | <i>Micropterus punctulatus</i> | 34.25087 | -96.54928 | UT 90.3444     | YFTC_2811  |
| M_punctulatus_YFTC_8332              | <i>Micropterus punctulatus</i> | 36.58436 | -84.23305 | YPM ICH 015481 | YFTC_8332  |
| M_punctulatus_YFTC_8333              | <i>Micropterus punctulatus</i> | 36.58436 | -84.23305 | YPM ICH 015481 | YFTC_8333  |
| M_punctulatus_UF_238439              | <i>Micropterus punctulatus</i> | 30.12935 | -85.14460 | UF 238439      | UF_238439  |

|                          |                                |          |           |                   |            |
|--------------------------|--------------------------------|----------|-----------|-------------------|------------|
| M_punctulatus_YFTC_10677 | <i>Micropterus punctulatus</i> | 34.95698 | -92.98479 | YPM ICH 018722    | YFTC_10677 |
| M_punctulatus_YFTC_10070 | <i>Micropterus punctulatus</i> | 37.25390 | -85.50249 | YPM ICH 017635    | YFTC_10070 |
| M_punctulatus_YFTC_1512  | <i>Micropterus punctulatus</i> | 37.51076 | -89.37737 | NA                | YFTC_1512  |
| M_punctulatus_YFTC_1513  | <i>Micropterus punctulatus</i> | 37.51076 | -89.37737 | NA                | YFTC_1513  |
| M_punctulatus_KSDNR_SPB1 | <i>Micropterus punctulatus</i> | 38.43727 | -96.55407 | NA                | KS_SPB1    |
| M_punctulatus_KSDNR_SPB2 | <i>Micropterus punctulatus</i> | 38.43727 | -96.55407 | NA                | KS_SPB2    |
| M_punctulatus_UF_165437  | <i>Micropterus punctulatus</i> | 37.11223 | -85.62584 | UF 165437         | UF_165437  |
| M_punctulatus_UF_165467  | <i>Micropterus punctulatus</i> | 36.65440 | -85.81794 | UF 165467         | UF_165467  |
| M_punctulatus_YFTC_6303  | <i>Micropterus punctulatus</i> | 36.92693 | -87.25648 | NA                | YFTC_6303  |
| M_punctulatus_YFTC_6304  | <i>Micropterus punctulatus</i> | 36.92693 | -87.25648 | NA                | YFTC_6304  |
| M_punctulatus_YFTC_2864  | <i>Micropterus punctulatus</i> | 34.42689 | -95.57836 | UT 90.3470        | YFTC_2864  |
| M_punctulatus_YFTC_2865  | <i>Micropterus punctulatus</i> | 34.42689 | -95.57836 | UT 90.3470        | YFTC_2865  |
| M_punctulatus_MW_D5      | <i>Micropterus punctulatus</i> | 30.45580 | -90.10470 | NA                | MW_D5      |
| M_punctulatus_MW_D6      | <i>Micropterus punctulatus</i> | 30.45580 | -90.10470 | NA                | MW_D6      |
| M_punctulatus_MW_D7      | <i>Micropterus punctulatus</i> | 30.45580 | -90.10470 | NA                | MW_D7      |
| M_punctulatus_MW_D8      | <i>Micropterus punctulatus</i> | 30.45580 | -90.10470 | NA                | MW_D8      |
| M_punctulatus_MW_E5      | <i>Micropterus punctulatus</i> | 32.70774 | -90.09378 | NA                | MW_E5      |
| M_punctulatus_MW_E6      | <i>Micropterus punctulatus</i> | 32.70774 | -90.09378 | NA                | MW_E6      |
| M_punctulatus_MW_E7      | <i>Micropterus punctulatus</i> | 32.60351 | -90.36390 | NA                | MW_E7      |
| M_punctulatus_MW_E8      | <i>Micropterus punctulatus</i> | 32.60351 | -90.36390 | NA                | MW_E8      |
| M_punctulatus_MMNS_4864  | <i>Micropterus punctulatus</i> | 31.26153 | -88.90308 | MMNS 67341 (TN-1) | MMNS_4864  |
| M_punctulatus_MMNS_4865  | <i>Micropterus punctulatus</i> | 31.26153 | -88.90308 | MMNS 67341 (TN-2) | MMNS_4865  |
| M_punctulatus_MMNS_4866  | <i>Micropterus punctulatus</i> | 31.26153 | -88.90308 | MMNS 67341 (TN-3) | MMNS_4866  |
| M_punctulatus_MMNS_4867  | <i>Micropterus punctulatus</i> | 31.26153 | -88.90308 | MMNS 67341 (TN-4) | MMNS_4867  |

|                               |                                |          |           |                   |                 |
|-------------------------------|--------------------------------|----------|-----------|-------------------|-----------------|
| M_punctulatus_MMNS_4869       | <i>Micropterus punctulatus</i> | 31.26153 | -88.90308 | MMNS 67341 (TN-6) | MMNS_4869       |
| M_punctulatus_MMNS_4874       | <i>Micropterus punctulatus</i> | 31.51618 | -90.03494 | MMNS 67343 (P1)   | MMNS_4874       |
| M_punctulatus_MMNS_4878       | <i>Micropterus punctulatus</i> | 31.51618 | -90.03494 | MMNS 67343 (P5)   | MMNS_4878       |
| M_punctulatus_MMNS_4881       | <i>Micropterus punctulatus</i> | 31.51618 | -90.03494 | MMNS 67343 (P8)   | MMNS_4881       |
| M_punctulatus_YFTC_10221      | <i>Micropterus punctulatus</i> | 38.32812 | -91.30255 | YPM ICH 020815    | YFTC_10221      |
| M_punctulatus_TCWC_17554-13.1 | <i>Micropterus punctulatus</i> | 30.40000 | -94.26000 | TCWC 17554-13.1   | TCWC_17554-13.1 |
| M_punctulatus_TCWC_17554-13.2 | <i>Micropterus punctulatus</i> | 30.40000 | -94.26000 | TCWC 17554-13.2   | TCWC_17554-13.2 |
| M_punctulatus_TCWC_17554-13.3 | <i>Micropterus punctulatus</i> | 30.40000 | -94.26000 | TCWC 17554-13.3   | TCWC_17554-13.3 |
| M_punctulatus_AT_TFAR034      | <i>Micropterus punctulatus</i> | 34.31427 | -94.93748 | NA                | AT_TFAR034      |
| M_punctulatus_AT_TFAR043      | <i>Micropterus punctulatus</i> | 34.30878 | -94.93570 | NA                | AT_TFAR043      |
| M_punctulatus_AT_GLVR019      | <i>Micropterus punctulatus</i> | 35.83623 | -94.91812 | NA                | AT_GLVR019      |
| M_punctulatus_AT_GLVR020      | <i>Micropterus punctulatus</i> | 35.83623 | -94.91812 | NA                | AT_GLVR020      |
| M_punctulatus_AT_SPRG079      | <i>Micropterus punctulatus</i> | 36.87100 | -94.76551 | NA                | AT_SPRG079      |
| M_punctulatus_AT_SPRG080      | <i>Micropterus punctulatus</i> | 36.87100 | -94.76551 | NA                | AT_SPRG080      |
| M_punctulatus_YFTC_15663      | <i>Micropterus punctulatus</i> | 30.45532 | -90.10522 | SELU 6337         | YFTC_15663      |
| M_punctulatus_YFTC_15665      | <i>Micropterus punctulatus</i> | 30.45532 | -90.10522 | SELU 6337         | YFTC_15665      |
| M_punctulatus_YFTC_32094      | <i>Micropterus punctulatus</i> | 30.48359 | -90.55675 | YPM ICH 031573    | YFTC_32094      |
| M_punctulatus_YFTC_4945       | <i>Micropterus punctulatus</i> | 31.36477 | -93.68563 | YPM ICH 021180    | YFTC_4945       |
| M_punctulatus_YFTC_4946       | <i>Micropterus punctulatus</i> | 31.36477 | -93.68563 | YPM ICH 021180    | YFTC_4946       |
| M_punctulatus_YFTC_10112      | <i>Micropterus punctulatus</i> | 36.74109 | -88.46171 | YPM ICH 018181    | YFTC_10112      |
| M_punctulatus_UF_167922       | <i>Micropterus punctulatus</i> | 36.59612 | -87.05993 | UF 167922         | UF_167922       |
| M_punctulatus_YFTC_3420       | <i>Micropterus punctulatus</i> | 35.39727 | -88.96834 | NA                | YFTC_3420       |
| M_punctulatus_YFTC_3442       | <i>Micropterus punctulatus</i> | 35.27371 | -88.91333 | NA                | YFTC_3442       |
| M_punctulatus_YFTC_3443       | <i>Micropterus punctulatus</i> | 35.27371 | -88.91333 | NA                | YFTC_3443       |

|                         |                                |          |           |                |            |
|-------------------------|--------------------------------|----------|-----------|----------------|------------|
| M_punctulatus_YFTC_3444 | <i>Micropterus punctulatus</i> | 35.27371 | -88.91333 | NA             | YFTC_3444  |
| M_punctulatus_YFTC_3445 | <i>Micropterus punctulatus</i> | 35.27371 | -88.91333 | NA             | YFTC_3445  |
| M_punctulatus_YFTC_3446 | <i>Micropterus punctulatus</i> | 35.27371 | -88.91333 | NA             | YFTC_3446  |
| M_punctulatus_TNHC_1683 | <i>Micropterus punctulatus</i> | 30.81340 | -97.25530 | TNHC 65236     | TNHC_1683  |
| M_punctulatus_TNHC_1684 | <i>Micropterus punctulatus</i> | 30.81340 | -97.25530 | TNHC 65236     | TNHC_1684  |
| M_punctulatus_TNHC_1711 | <i>Micropterus punctulatus</i> | 31.12461 | -97.23254 | TNHC 65264     | TNHC_1711  |
| M_punctulatus_TNHC_1715 | <i>Micropterus punctulatus</i> | 31.12461 | -97.23254 | TNHC 65264     | TNHC_1715  |
| M_punctulatus_TNHC_596  | <i>Micropterus punctulatus</i> | 31.84447 | -97.20150 | TNHC 55324     | TNHC_596   |
| M_punctulatus_TNHC_159  | <i>Micropterus punctulatus</i> | 30.58280 | -99.31970 | TNHC 47890     | TNHC_159   |
| M_punctulatus_TNHC_303  | <i>Micropterus punctulatus</i> | 30.22257 | -97.40945 | TNHC 47932     | TNHC_303   |
| M_punctulatus_YFTC_2477 | <i>Micropterus punctulatus</i> | 35.18041 | -88.20965 | UT 90.3331     | YFTC_2477  |
| M_salmoides_YFTC_21513  | <i>Micropterus salmoides</i>   | 27.67153 | -82.35422 | YPM ICH 026208 | YFTC_21513 |
| M_salmoides_YFTC_21514  | <i>Micropterus salmoides</i>   | 27.67153 | -82.35422 | YPM ICH 026208 | YFTC_21514 |
| M_salmoides_YFTC_21449  | <i>Micropterus salmoides</i>   | 29.08078 | -81.56747 | YPM ICH 025176 | YFTC_21449 |
| M_salmoides_YFTC_21463  | <i>Micropterus salmoides</i>   | 29.08078 | -81.56747 | YPM ICH 025180 | YFTC_21463 |
| M_salmoides_YFTC_21464  | <i>Micropterus salmoides</i>   | 29.08078 | -81.56747 | YPM ICH 025180 | YFTC_21464 |
| M_salmoides_YFTC_21465  | <i>Micropterus salmoides</i>   | 29.08078 | -81.56747 | YPM ICH 025180 | YFTC_21465 |
| M_salmoides_YFTC_21466  | <i>Micropterus salmoides</i>   | 29.08078 | -81.56747 | YPM ICH 025180 | YFTC_21466 |
| M_salmoides_YFTC_31870  | <i>Micropterus salmoides</i>   | 30.44071 | -84.98630 | YPM ICH 031356 | YFTC_31870 |
| M_salmoides_YFTC_31871  | <i>Micropterus salmoides</i>   | 30.44071 | -84.98630 | YPM ICH 031356 | YFTC_31871 |
| M_salmoides_YFTC_31872  | <i>Micropterus salmoides</i>   | 30.44071 | -84.98630 | YPM ICH 031356 | YFTC_31872 |
| M_salmoides_YFTC_31873  | <i>Micropterus salmoides</i>   | 30.44071 | -84.98630 | YPM ICH 031356 | YFTC_31873 |
| M_salmoides_YFTC_31874  | <i>Micropterus salmoides</i>   | 30.44071 | -84.98630 | YPM ICH 031356 | YFTC_31874 |
| M_salmoides_YFTC_31875  | <i>Micropterus salmoides</i>   | 30.44071 | -84.98630 | YPM ICH 031356 | YFTC_31875 |



|                                      |                              |          |           |                |            |
|--------------------------------------|------------------------------|----------|-----------|----------------|------------|
| M_salmoides_YFTC_31876               | <i>Micropterus salmoides</i> | 30.44071 | -84.98630 | YPM ICH 031356 | YFTC_31876 |
| M_salmoides_YFTC_31877               | <i>Micropterus salmoides</i> | 30.44071 | -84.98630 | YPM ICH 031356 | YFTC_31877 |
| M_salmoides_YFTC_31878               | <i>Micropterus salmoides</i> | 30.44071 | -84.98630 | YPM ICH 031356 | YFTC_31878 |
| M_salmoides_UF_183556                | <i>Micropterus salmoides</i> | 30.15569 | -84.21283 | UF 183556      | UF_183556  |
| M_salmoides_YFTC_31606               | <i>Micropterus salmoides</i> | 26.72374 | -81.69197 | YPM ICH 031497 | YFTC_31606 |
| M_salmoides_YFTC_31607               | <i>Micropterus salmoides</i> | 26.72374 | -81.69197 | YPM ICH 031497 | YFTC_31607 |
| M_salmoides_YFTC_31611               | <i>Micropterus salmoides</i> | 26.72374 | -81.69197 | YPM ICH 031497 | YFTC_31611 |
| M_salmoides_YFTC_31613               | <i>Micropterus salmoides</i> | 26.72374 | -81.69197 | YPM ICH 031497 | YFTC_31613 |
| M_salmoides_YFTC_31614               | <i>Micropterus salmoides</i> | 26.72374 | -81.69197 | YPM ICH 031497 | YFTC_31614 |
| M_salmoides_YFTC_31615               | <i>Micropterus salmoides</i> | 26.72374 | -81.69197 | YPM ICH 031497 | YFTC_31615 |
| M_salmoides_YFTC_31616               | <i>Micropterus salmoides</i> | 26.72374 | -81.69197 | YPM ICH 031497 | YFTC_31616 |
| M_salmoides_YFTC_31617               | <i>Micropterus salmoides</i> | 26.72374 | -81.69197 | YPM ICH 031497 | YFTC_31617 |
| M_salmoides_YFTC_31618               | <i>Micropterus salmoides</i> | 26.72374 | -81.69197 | YPM ICH 031497 | YFTC_31618 |
| M_salmoides_YFTC_31619               | <i>Micropterus salmoides</i> | 26.72374 | -81.69197 | YPM ICH 031497 | YFTC_31619 |
| M_salmoides_YFTC_31620               | <i>Micropterus salmoides</i> | 26.72374 | -81.69197 | YPM ICH 031497 | YFTC_31620 |
| M_salmoides_YFTC_31621               | <i>Micropterus salmoides</i> | 26.72374 | -81.69197 | YPM ICH 031497 | YFTC_31621 |
| M_salmoides_X_M_nigricans_YFTC_31912 | <i>Micropterus salmoides</i> | 30.80182 | -85.82888 | YPM ICH 031464 | YFTC_31912 |
| M_salmoides_X_M_nigricans_YFTC_31923 | <i>Micropterus salmoides</i> | 30.80182 | -85.82888 | YPM ICH 031671 | YFTC_31923 |
| M_salmoides_X_M_nigricans_YFTC_31924 | <i>Micropterus salmoides</i> | 30.80182 | -85.82888 | YPM ICH 031671 | YFTC_31924 |
| M_salmoides_X_M_nigricans_YFTC_31925 | <i>Micropterus salmoides</i> | 30.80182 | -85.82888 | YPM ICH 031671 | YFTC_31925 |
| M_salmoides_X_M_nigricans_YFTC_31929 | <i>Micropterus salmoides</i> | 30.80182 | -85.82888 | YPM ICH 031671 | YFTC_31929 |
| M_salmoides_X_M_nigricans_YFTC_31930 | <i>Micropterus salmoides</i> | 30.80182 | -85.82888 | YPM ICH 031671 | YFTC_31930 |
| M_salmoides_X_M_nigricans_YFTC_31931 | <i>Micropterus salmoides</i> | 30.80182 | -85.82888 | YPM ICH 031671 | YFTC_31931 |
| M_salmoides_X_M_nigricans_YFTC_31932 | <i>Micropterus salmoides</i> | 30.80182 | -85.82888 | YPM ICH 031671 | YFTC_31932 |

|                                      |                              |          |           |                |            |
|--------------------------------------|------------------------------|----------|-----------|----------------|------------|
| M_salmoides_X_M_nigricans_YFTC_31933 | <i>Micropterus salmoides</i> | 30.80182 | -85.82888 | YPM ICH 031671 | YFTC_31933 |
| M_salmoides_X_M_nigricans_YFTC_31934 | <i>Micropterus salmoides</i> | 30.80182 | -85.82888 | YPM ICH 031671 | YFTC_31934 |
| M_salmoides_X_M_nigricans_YFTC_31935 | <i>Micropterus salmoides</i> | 30.80182 | -85.82888 | YPM ICH 031671 | YFTC_31935 |
| M_salmoides_X_M_nigricans_YFTC_31936 | <i>Micropterus salmoides</i> | 30.80182 | -85.82888 | YPM ICH 031671 | YFTC_31936 |
| M_salmoides_YFTC_31601               | <i>Micropterus salmoides</i> | 27.34407 | -82.15678 | YPM ICH 031534 | YFTC_31601 |
| M_salmoides_YFTC_31602               | <i>Micropterus salmoides</i> | 27.34407 | -82.15678 | YPM ICH 031534 | YFTC_31602 |
| M_salmoides_YFTC_31603               | <i>Micropterus salmoides</i> | 27.34407 | -82.15678 | YPM ICH 031534 | YFTC_31603 |
| M_salmoides_YFTC_31691               | <i>Micropterus salmoides</i> | 29.04922 | -82.44736 | YPM ICH 031524 | YFTC_31691 |
| M_salmoides_YFTC_31692               | <i>Micropterus salmoides</i> | 29.04922 | -82.44736 | YPM ICH 031524 | YFTC_31692 |
| M_salmoides_YFTC_31693               | <i>Micropterus salmoides</i> | 29.04922 | -82.44736 | YPM ICH 031524 | YFTC_31693 |
| M_salmoides_UF_162702                | <i>Micropterus salmoides</i> | 26.21472 | -80.28000 | UF 162702      | UF_162702  |
| M_salmoides_UF_158845                | <i>Micropterus salmoides</i> | 29.86056 | -82.22944 | UF 158845      | UF_158845  |
| M_salmoides_YFTC_31525               | <i>Micropterus salmoides</i> | 31.42717 | -81.60641 | YPM ICH 031561 | YFTC_31525 |
| M_salmoides_YFTC_31526               | <i>Micropterus salmoides</i> | 31.42717 | -81.60641 | YPM ICH 031561 | YFTC_31526 |
| M_salmoides_YFTC_31527               | <i>Micropterus salmoides</i> | 31.42717 | -81.60641 | YPM ICH 031561 | YFTC_31527 |
| M_salmoides_YFTC_31552               | <i>Micropterus salmoides</i> | 31.22039 | -81.86717 | YPM ICH 031537 | YFTC_31552 |
| M_salmoides_YFTC_31553               | <i>Micropterus salmoides</i> | 31.22039 | -81.86717 | YPM ICH 031537 | YFTC_31553 |
| M_salmoides_X_M_nigricans_YFTC_37726 | <i>Micropterus salmoides</i> | 35.57329 | -78.97571 | YPM ICH 033045 | YFTC_37726 |
| M_salmoides_X_M_nigricans_YFTC_37727 | <i>Micropterus salmoides</i> | 35.57329 | -78.97571 | YPM ICH 033045 | YFTC_37727 |
| M_salmoides_X_M_nigricans_YFTC_35853 | <i>Micropterus salmoides</i> | 35.75319 | -81.89163 | YPM ICH 033437 | YFTC_35853 |
| M_salmoides_YFTC_37259               | <i>Micropterus salmoides</i> | 34.30055 | -78.55161 | YPM ICH 032712 | YFTC_37259 |
| M_salmoides_YFTC_37637               | <i>Micropterus salmoides</i> | 36.19096 | -76.46647 | YPM ICH 032649 | YFTC_37637 |
| M_salmoides_YFTC_37638               | <i>Micropterus salmoides</i> | 36.19096 | -76.46647 | YPM ICH 032649 | YFTC_37638 |
| M_salmoides_X_M_nigricans_YFTC_29901 | <i>Micropterus salmoides</i> | 36.38263 | -79.98060 | YPM ICH 031111 | YFTC_29901 |

|                                      |                                |          |            |                |                 |
|--------------------------------------|--------------------------------|----------|------------|----------------|-----------------|
| M_salmoides_X_M_nigricans_YFTC_35413 | <i>Micropterus salmoides</i>   | 35.43880 | -79.99930  | YPM ICH 033497 | YFTC_35413      |
| M_salmoides_YFTC_6197                | <i>Micropterus salmoides</i>   | 32.49464 | -81.55544  | UT 90.3686     | YFTC_6197       |
| M_salmoides_YFTC_6198                | <i>Micropterus salmoides</i>   | 32.49464 | -81.55544  | UT 90.3686     | YFTC_6198       |
| M_salmoides_SCDNR_MISA00001          | <i>Micropterus salmoides</i>   | 32.95786 | -80.20058  | NA             | SCDNR_MISA00001 |
| M_salmoides_SCDNR_MISA00002          | <i>Micropterus salmoides</i>   | 32.95786 | -80.20058  | NA             | SCDNR_MISA00002 |
| M_salmoides_SCDNR_MISA00003          | <i>Micropterus salmoides</i>   | 32.95786 | -80.20058  | NA             | SCDNR_MISA00003 |
| M_salmoides_SCDNR_MISA00004          | <i>Micropterus salmoides</i>   | 32.95786 | -80.20058  | NA             | SCDNR_MISA00004 |
| M_salmoides_SCDNR_MISA00006          | <i>Micropterus salmoides</i>   | 32.95786 | -80.20058  | NA             | SCDNR_MISA00006 |
| M_salmoides_SCDNR_MISA00007          | <i>Micropterus salmoides</i>   | 33.05735 | -79.95840  | NA             | SCDNR_MISA00007 |
| M_salmoides_SCDNR_MISA00005          | <i>Micropterus salmoides</i>   | 32.67926 | -80.41730  | NA             | SCDNR_MISA00005 |
| M_salmoides_X_M_nigricans_YFTC_4947  | <i>Micropterus salmoides</i>   | 31.36477 | -93.68563  | YPM ICH 021177 | YFTC_4947       |
| M_salmoides_YFTC_6125                | <i>Micropterus salmoides</i>   | 33.27752 | -82.29718  | UT 90.3712     | YFTC_6125       |
| M_salmoides_YFTC_6126                | <i>Micropterus salmoides</i>   | 33.27752 | -82.29718  | UT 90.3712     | YFTC_6126       |
| M_salmoides_YFTC_6127                | <i>Micropterus salmoides</i>   | 33.27752 | -82.29718  | UT 90.3712     | YFTC_6127       |
| M_salmoides_YFTC_16737               | <i>Micropterus salmoides</i>   | 34.25844 | -78.52364  | YPM ICH 028445 | YFTC_16737      |
| M_salmoides_YFTC_16746               | <i>Micropterus salmoides</i>   | 34.25844 | -78.52364  | YPM ICH 028438 | YFTC_16746      |
| M_tallapoosae_YFTC_19301             | <i>Micropterus tallapoosae</i> | 33.59300 | -85.26390  | GMNHTC 8637    | YFTC_19301      |
| M_tallapoosae_YFTC_35174             | <i>Micropterus tallapoosae</i> | 33.76287 | -85.22267  | YPM ICH 033313 | YFTC_35174      |
| M_tallapoosae_YFTC_35176             | <i>Micropterus tallapoosae</i> | 33.76287 | -85.22267  | YPM ICH 033313 | YFTC_35176      |
| M_tallapoosae_YFTC_35177             | <i>Micropterus tallapoosae</i> | 33.76287 | -85.22267  | YPM ICH 033313 | YFTC_35177      |
| M_treculii_X_M_punctulatus_YFTC_402  | <i>Micropterus treculii</i>    | 29.53572 | -97.88082  | INHS 40486     | YFTC_402        |
| M_treculii_TCWC_17548-01             | <i>Micropterus treculii</i>    | 29.97000 | -101.15000 | TCWC 17548-01  | TCWC_17548-01   |
| M_treculii_YFTC_399                  | <i>Micropterus treculii</i>    | 29.94875 | -98.92572  | INHS 41173     | YFTC_399        |
| M_treculii_YFTC_24670                | <i>Micropterus treculii</i>    | 30.47059 | -99.78509  | YPM ICH 027988 | YFTC_24670      |

|                                  |                                 |          |            |                |               |
|----------------------------------|---------------------------------|----------|------------|----------------|---------------|
| M_treculii_TCWC_17549-03         | <i>Micropterus treculii</i>     | 30.91886 | -99.78382  | TCWC 17549-03  | TCWC_17549-03 |
| M_treculii_TNHC_1333             | <i>Micropterus treculii</i>     | 30.00440 | -97.95460  | TNHC 63180     | TNHC_1333     |
| M_treculii_TNHC_1698             | <i>Micropterus treculii</i>     | 30.90180 | -96.95830  | TNHC 64922     | TNHC_1698     |
| M_treculii_TNHC_401              | <i>Micropterus treculii</i>     | 30.57820 | -99.32330  | TNHC 47410     | TNHC_401      |
| M_treculii_TNHC_402              | <i>Micropterus treculii</i>     | 30.57820 | -99.32330  | TNHC 47410     | TNHC_402      |
| M_treculii_TNHC_571              | <i>Micropterus treculii</i>     | 29.72085 | -100.03326 | TNHC 55105     | TNHC_571      |
| M_velox_X_M_dolomieu_AT_BIGSU014 | <i>Micropterus velox</i>        | 36.61673 | -94.35070  | NA             | AT_BIGSU014   |
| M_velox_AT_INDI031               | <i>Micropterus velox</i>        | 36.79318 | -94.24312  | NA             | AT_INDI031    |
| M_velox_X_M_dolomieu_AT_SMBGR073 | <i>Micropterus velox</i>        | 36.55491 | -94.49785  | NA             | AT_SMBGR073   |
| M_velox_X_M_dolomieu_AT_SHOAL011 | <i>Micropterus velox</i>        | 36.92026 | -94.34571  | NA             | AT_SHOAL011   |
| M_velox_AT_BFORK013              | <i>Micropterus velox</i>        | 35.93656 | -94.82767  | NA             | AT_BFORK013   |
| M_velox_AT_SMBGR016              | <i>Micropterus velox</i>        | 36.54624 | -94.68764  | NA             | AT_SMBGR016   |
| M_velox_AT_GRSPB004              | <i>Micropterus velox</i>        | 35.84151 | -94.77270  | NA             | AT_GRSPB004   |
| M_velox_AT_NOIS017               | <i>Micropterus velox</i>        | 35.84151 | -94.77270  | NA             | AT_NOIS017    |
| M_velox_AT_BFC014                | <i>Micropterus velox</i>        | 35.56405 | -94.53228  | NA             | AT_BFC014     |
| M_velox_AT_SPVW013               | <i>Micropterus velox</i>        | 36.32432 | -94.69931  | NA             | AT_SPVW013    |
| M_velox_AT_CLPD1                 | <i>Micropterus velox</i>        | 36.77426 | -94.68473  | NA             | AT_CLPD1      |
| M_warriorensis_YFTC_36235        | <i>Micropterus warriorensis</i> | 33.52186 | -87.48497  | YPM ICH 032201 | YFTC_36235    |
| M_warriorensis_YFTC_32217        | <i>Micropterus warriorensis</i> | 33.91751 | -86.81700  | YPM ICH 031737 | YFTC_32217    |
| M_warriorensis_YFTC_32218        | <i>Micropterus warriorensis</i> | 33.91751 | -86.81700  | YPM ICH 031737 | YFTC_32218    |
| M_warriorensis_YFTC_32225        | <i>Micropterus warriorensis</i> | 33.91751 | -86.81700  | YPM ICH 031737 | YFTC_32225    |
| M_warriorensis_YFTC_37096        | <i>Micropterus warriorensis</i> | 34.28514 | -87.39899  | YPM ICH 031861 | YFTC_37096    |
| M_warriorensis_YFTC_37097        | <i>Micropterus warriorensis</i> | 34.28514 | -87.39899  | YPM ICH 031861 | YFTC_37097    |

---

**Supplementary Table S2.** Pairwise *Fst* (above diagonal) and Nei's standard genetic distance (below diagonal) values of combined ddRAD loci for the 19 delimited species of *Micropterus* in the present study. Species abbreviations: Malt, *Micropterus cf. coosae* Altamaha; Mcah, *Micropterus cahabae*; Mcat, *Micropterus cataractae*; Mcho, *Micropterus cf. punctulatus*; Mcht, *Micropterus chattahoochae*; Mcoo, *Micropterus coosae*; Mdol, *Micropterus dolomieu*; Mlit, *Micropterus cf. dolomieu* Little; Moua, *Micropterus cf. dolomieu* Ouachita; Mvel, *Micropterus velox*; Msal, *Micropterus salmoides*; Mhen, *Micropterus henshalli*; Mnot, *Micropterus notius*; Mpun, *Micropterus punctulatus*; Mnig, *Micropterus nigricans*; Mbrt, *Micropterus cf. coosae* Bartram's; Mtal, *Micropterus tallapoosae*; Mtre, *Micropterus treculii*; Mwar, *Micropterus warriorensis*.

| Species | Malt | Mcah | Mcat | Mcho | Mcht | Mcoo | Mdol | Mlit | Moua | Mvel | Msal | Mhen | Mnot | Mpun | Mnig | Mbrt | Mtal | Mtre | Mwar |
|---------|------|------|------|------|------|------|------|------|------|------|------|------|------|------|------|------|------|------|------|
| Malt    |      | 0.64 | 0.90 | 0.80 | 0.41 | 0.62 | 0.78 | 0.85 | 0.87 | 0.81 | 0.82 | 0.77 | 0.96 | 0.81 | 0.72 | 0.47 | 0.70 | 0.77 | 0.77 |
| Mcah    | 0.03 |      | 0.84 | 0.68 | 0.44 | 0.24 | 0.73 | 0.76 | 0.79 | 0.76 | 0.80 | 0.64 | 0.92 | 0.75 | 0.69 | 0.61 | 0.34 | 0.69 | 0.61 |
| Mcat    | 0.08 | 0.07 |      | 0.87 | 0.80 | 0.83 | 0.81 | 0.88 | 0.89 | 0.86 | 0.83 | 0.85 | 0.95 | 0.85 | 0.74 | 0.86 | 0.87 | 0.83 | 0.88 |
| Mcho    | 0.05 | 0.04 | 0.07 |      | 0.64 | 0.68 | 0.74 | 0.80 | 0.83 | 0.78 | 0.81 | 0.55 | 0.94 | 0.64 | 0.70 | 0.76 | 0.73 | 0.58 | 0.76 |
| Mcht    | 0.02 | 0.02 | 0.06 | 0.04 |      | 0.45 | 0.71 | 0.72 | 0.75 | 0.72 | 0.79 | 0.62 | 0.91 | 0.72 | 0.68 | 0.40 | 0.44 | 0.66 | 0.59 |
| Mcoo    | 0.03 | 0.01 | 0.07 | 0.04 | 0.02 |      | 0.73 | 0.76 | 0.78 | 0.75 | 0.80 | 0.64 | 0.91 | 0.75 | 0.69 | 0.59 | 0.32 | 0.70 | 0.59 |
| Mdol    | 0.07 | 0.06 | 0.07 | 0.06 | 0.05 | 0.06 |      | 0.38 | 0.36 | 0.49 | 0.81 | 0.73 | 0.88 | 0.75 | 0.73 | 0.77 | 0.74 | 0.74 | 0.76 |
| Mlit    | 0.07 | 0.06 | 0.08 | 0.06 | 0.06 | 0.06 | 0.01 |      | 0.44 | 0.57 | 0.82 | 0.78 | 0.94 | 0.79 | 0.72 | 0.82 | 0.80 | 0.76 | 0.82 |
| Moua    | 0.07 | 0.06 | 0.08 | 0.06 | 0.06 | 0.06 | 0.01 | 0.01 |      | 0.60 | 0.82 | 0.80 | 0.95 | 0.81 | 0.73 | 0.83 | 0.82 | 0.78 | 0.84 |
| Mvel    | 0.07 | 0.06 | 0.08 | 0.06 | 0.06 | 0.06 | 0.02 | 0.02 | 0.02 |      | 0.82 | 0.77 | 0.92 | 0.80 | 0.73 | 0.80 | 0.77 | 0.77 | 0.79 |
| Msal    | 0.09 | 0.08 | 0.09 | 0.08 | 0.08 | 0.08 | 0.09 | 0.09 | 0.09 | 0.09 |      | 0.80 | 0.87 | 0.82 | 0.41 | 0.82 | 0.80 | 0.81 | 0.81 |
| Mhen    | 0.05 | 0.03 | 0.07 | 0.02 | 0.03 | 0.03 | 0.05 | 0.06 | 0.06 | 0.06 | 0.08 |      | 0.92 | 0.60 | 0.70 | 0.74 | 0.68 | 0.55 | 0.71 |
| Mnot    | 0.12 | 0.11 | 0.11 | 0.11 | 0.11 | 0.11 | 0.11 | 0.11 | 0.12 | 0.12 | 0.12 | 0.11 |      | 0.91 | 0.80 | 0.94 | 0.94 | 0.90 | 0.94 |
| Mpun    | 0.06 | 0.04 | 0.07 | 0.03 | 0.04 | 0.05 | 0.05 | 0.05 | 0.06 | 0.06 | 0.09 | 0.02 | 0.11 |      | 0.74 | 0.80 | 0.77 | 0.51 | 0.78 |
| Mnig    | 0.09 | 0.07 | 0.08 | 0.08 | 0.07 | 0.07 | 0.08 | 0.08 | 0.08 | 0.09 | 0.02 | 0.07 | 0.11 | 0.08 |      | 0.72 | 0.69 | 0.72 | 0.71 |

|      |      |      |      |      |      |      |      |      |      |      |      |      |      |      |      |      |      |      |      |
|------|------|------|------|------|------|------|------|------|------|------|------|------|------|------|------|------|------|------|------|
| Mbrt | 0.01 | 0.03 | 0.07 | 0.05 | 0.02 | 0.03 | 0.06 | 0.07 | 0.07 | 0.07 | 0.09 | 0.05 | 0.12 | 0.06 | 0.08 |      | 0.65 | 0.75 | 0.72 |
| Mtal | 0.03 | 0.01 | 0.07 | 0.04 | 0.02 | 0.01 | 0.06 | 0.06 | 0.06 | 0.07 | 0.08 | 0.04 | 0.11 | 0.05 | 0.08 | 0.03 |      | 0.72 | 0.65 |
| Mtre | 0.06 | 0.04 | 0.07 | 0.02 | 0.04 | 0.05 | 0.05 | 0.06 | 0.06 | 0.06 | 0.09 | 0.02 | 0.11 | 0.02 | 0.08 | 0.05 | 0.05 |      | 0.74 |
| Mwar | 0.04 | 0.03 | 0.07 | 0.05 | 0.03 | 0.03 | 0.06 | 0.06 | 0.07 | 0.07 | 0.09 | 0.04 | 0.11 | 0.05 | 0.08 | 0.04 | 0.03 | 0.05 |      |

**Supplementary Table S3.** Models tested in the Fastsimcoal2 analysis for the Spotted Bass complex. Parameter estimates of the highest estimated log-likelihood (MaxEstLhood) for each model are shown. Best-fit model for each population is highlighted. Species, populations, and model parameter abbreviations correspond to those shown in Supplementary Fig. S4. Species or population names and ANCSIZE are population size parameters. Timing parameters for divergence (TDIV), migration (TMIG and Tstop), and human-mediated introduction (TINT) are in the number of generations, assuming a generation time of three years. The mean and 95% confidence interval of each parameter from 100 parametric bootstrap replications is shown for models highlighted in bold.

| Topology 'Texas1' (MaxObsLhood: -13780.4; AIC: 30372)  |         |         |         |        |            |            |             |            |             |      |             |
|--------------------------------------------------------|---------|---------|---------|--------|------------|------------|-------------|------------|-------------|------|-------------|
| ANCSIZE                                                | Mpun    | MpunSN  | MpunBZ  | Mtre   | TDIV_sn_pu | TDIV_bz_tr | MaxEstLhood |            |             |      |             |
| 1453139                                                | 625484  | 1147728 | 1855270 | 385447 | 357440     | 271951     | -15179      |            |             |      |             |
| Topology 'Texas2' (AIC: 30506.9)                       |         |         |         |        |            |            |             |            |             |      |             |
| ANCSIZE                                                | Mpun    | MpunSN  | MpunBZ  | Mtre   | TDIV_sn_tr | TDIV_bz_tr | MaxEstLhood |            |             |      |             |
| 1355873                                                | 700680  | 1071720 | 2085302 | 339545 | 398475     | 233690     | -15246.5    |            |             |      |             |
| Gene-flow 'Texas1' (MaxObsLhood: -13780.4; AIC: 29362) |         |         |         |        |            |            |             |            |             |      |             |
| ANCSIZE                                                | Mpun    | MpunSN  | MpunBZ  | Mtre   | s_bz       | TDIV_sn_pu | TDIV_bz_tr  | TMIG       | MaxEstLhood |      |             |
| 801700                                                 | 443023  | 941938  | 145750  | 294386 | 0.26652    | 250136     | 99849       | 7066       | -14672      |      |             |
| <b>Gene-flow 'Texas2' (AIC: 29354.8)</b>               |         |         |         |        |            |            |             |            |             |      |             |
|                                                        | ANCSIZE | Mpun    | MpunSN  | MpunBZ | Mtre       | s_bz       | b_sn        | TDIV_sn_pu | TDIV_bz_tr  | TMIG | MaxEstLhood |
|                                                        | 788703  | 439147  | 871750  | 171754 | 305259     | 0.261683   | 6.48E-05    | 234564     | 94639       | 8218 | -14667.4    |
| Mean                                                   | 701290  | 436100  | 836920  | 180967 | 306350     | 0.26       | 3.00E-04    | 235112     | 97000       | 8805 |             |

|                                                                      |        |         |        |        |             |            |             |            |             |             |
|----------------------------------------------------------------------|--------|---------|--------|--------|-------------|------------|-------------|------------|-------------|-------------|
| Lower 95%                                                            | 596917 | 399443  | 722075 | 142493 | 285008      | 0.24       | 9.99E-08    | 218562     | 83425       | 5920        |
| Upper 95%                                                            | 788703 | 472991  | 936467 | 236454 | 329756      | 0.28       | 2.18E-03    | 251693     | 114666      | 12628       |
| Gene-flow 'Texas3' (AIC: 29431.4)                                    |        |         |        |        |             |            |             |            |             |             |
| ANCSIZE                                                              | Mpun   | MpunSN  | MpunBZ | Mtre   | s_bz        | b_sn       | TDIV_sn_pu  | TDIV_bz_tr | Tstop       | MaxEstLhood |
| 811535                                                               | 465340 | 748718  | 316885 | 305963 | 3.79E-06    | 8.94E-08   | 229548      | 95000      | 2935        | -14705.7    |
| Gene-flow 'Texas4' (AIC: 29391.3)                                    |        |         |        |        |             |            |             |            |             |             |
| ANCSIZE                                                              | Mpun   | MpunSN  | MpunBZ | Mtre   | TINT        | s_bz       | b_sn        | TDIV_sn_pu | TDIV_bz_tr  | MaxEstLhood |
| 837343                                                               | 460657 | 1008734 | 167522 | 309978 | 132         | 0.244617   | 1.70E-04    | 242837     | 99935       | -14685.7    |
| Gene-flow 'Texas5' (AIC: 29361.4)                                    |        |         |        |        |             |            |             |            |             |             |
| ANCSIZE                                                              | Mpun   | MpunSN  | MpunBZ | Mtre   | s_bz        | t_sn       | TDIV_sn_pu  | TDIV_bz_tr | TMIG        | MaxEstLhood |
| 713487                                                               | 452065 | 997821  | 151790 | 322456 | 0.256701    | 0.002489   | 245075      | 95014      | 6256        | -14670.7    |
| Gene-flow 'Texas6' (AIC: 29391.7)                                    |        |         |        |        |             |            |             |            |             |             |
| ANCSIZE                                                              | Mpun   | MpunSN  | MpunBZ | Mtre   | TINT        | s_bz       | t_sn        | TDIV_sn_pu | TDIV_bz_tr  | MaxEstLhood |
| 746385                                                               | 440670 | 902787  | 140795 | 310317 | 23          | 0.25171    | 0.002231    | 230431     | 93934       | -14685.8    |
| Gene-flow 'Texas7' (AIC: 29390.9)                                    |        |         |        |        |             |            |             |            |             |             |
| ANCSIZE                                                              | Mpun   | MpunSN  | MpunBZ | Mtre   | TINT        | s_bz       | TDIV_sn_pu  | TDIV_bz_tr | MaxEstLhood |             |
| 804304                                                               | 444411 | 948533  | 219481 | 316548 | 7           | 0.25738    | 254684      | 126298     | -14686.4    |             |
| Topology 'Spotted_SVDQuartets' (MaxObsLhood: -12386.7; AIC: 26495.8) |        |         |        |        |             |            |             |            |             |             |
| ANCSIZE                                                              | Mcho   | Mhen    | Mpun   | Mtre   | MaxEstLhood |            |             |            |             |             |
| 1348557                                                              | 549348 | 582384  | 536315 | 319320 | -13242.9    |            |             |            |             |             |
| Topology 'Spotted_IQTREE' (AIC: 26574)                               |        |         |        |        |             |            |             |            |             |             |
| ANCSIZE                                                              | Mcho   | Mhen    | Mpun   | Mtre   | TDIV_he_pu  | TDIV_tr_pu | MaxEstLhood |            |             |             |
| 1359828                                                              | 656985 | 588414  | 495859 | 315560 | 632941      | 469845     | -13280      |            |             |             |
| Topology 'Spotted_Gulf1' (MaxObsLhood: -86502.8; AIC: 203012)        |        |         |        |        |             |            |             |            |             |             |
| ANCSIZE                                                              | Mcho   | Mhen    | Mpun   | Mtre   | MpunPP      | MpunPS     | TDIV_pp_he  | TDIV_ps_pp | MaxEstLhood |             |
| 1424310                                                              | 544250 | 968880  | 913363 | 561728 | 1051035     | 1010963    | 559088      | 244351     | -101497     |             |
| Topology 'Spotted_Gulf2' (AIC: 201876.9)                             |        |         |        |        |             |            |             |            |             |             |
| ANCSIZE                                                              | Mcho   | Mhen    | Mpun   | Mtre   | MpunPP      | MpunPS     | TDIV_pp_pu  | TDIV_ps_pp | MaxEstLhood |             |
| 1427227                                                              | 564379 | 1208711 | 835425 | 511866 | 958988      | 949672     | 395281      | 232703     | -100929     |             |
| Topology 'Spotted_Gulf3' (AIC: 202655.4)                             |        |         |        |        |             |            |             |            |             |             |
| ANCSIZE                                                              | Mcho   | Mhen    | Mpun   | Mtre   | MpunPP      | MpunPS     | TDIV_ps_pu  | TDIV_pp_pu | MaxEstLhood |             |
| 1470645                                                              | 531059 | 1249799 | 896647 | 503156 | 979534      | 1168994    | 386263      | 343188     | -101319     |             |

| Topology 'Spotted_Gulf4' (AIC: 202287.8)                              |         |         |         |        |         |         |            |            |             |            |             |             |
|-----------------------------------------------------------------------|---------|---------|---------|--------|---------|---------|------------|------------|-------------|------------|-------------|-------------|
| ANCSIZE                                                               | Mcho    | Mhen    | Mpun    | Mtre   | MpunPP  | MpunPS  | TDIV_ps_pu | TDIV_pp_pu | MaxEstLhood |            |             |             |
| 1547620                                                               | 571979  | 1395879 | 845927  | 491190 | 1122078 | 1292945 | 501755     | 428341     | -101135     |            |             |             |
| Topology 'Spotted_Gulf5' (AIC: 205704.1)                              |         |         |         |        |         |         |            |            |             |            |             |             |
| ANCSIZE                                                               | Mcho    | Mhen    | Mpun    | Mtre   | MpunPP  | MpunPS  | TDIV_ps_he | TDIV_pp_he | MaxEstLhood |            |             |             |
| 1499295                                                               | 569147  | 849729  | 1001140 | 561264 | 953517  | 1223066 | 479814     | 421566     | -102843     |            |             |             |
| Gene-flow 'Spotted_Gulf1' (MaxObsLhood: -86502.8; AIC: 205956.9)      |         |         |         |        |         |         |            |            |             |            |             |             |
| ANCSIZE                                                               | Mcho    | Mhen    | Mpun    | Mtre   | MpunPP  | MpunPS  | h_ps       | h_pp       | TDIV_pp_pu  | TDIV_ps_pp | TMIG_h_ps   | TMIG_h_pp   |
| 1444497                                                               | 475343  | 849527  | 921873  | 569102 | 700010  | 792420  | 2.12E-07   | 2.31E-04   | 398704      | 353724     | 314566      | 334310      |
| MaxEstLhood                                                           |         |         |         |        |         |         |            |            |             |            |             |             |
| -102965                                                               |         |         |         |        |         |         |            |            |             |            |             |             |
| Gene-flow 'Spotted_Gulf2' (AIC: 204465.8)                             |         |         |         |        |         |         |            |            |             |            |             |             |
|                                                                       | ANCSIZE | Mcho    | Mhen    | Mpun   | Mtre    | MpunPP  | MpunPS     | h_pp       | TDIV_pp_pu  | TDIV_ps_pp | TMIG_h_pp   | MaxEstLhood |
|                                                                       | 1219452 | 535868  | 987258  | 951864 | 549556  | 679243  | 778276     | 2.84E-04   | 395539      | 193259     | 350024      | -102222     |
| Mean                                                                  | 893078  | 514823  | 964720  | 934269 | 530092  | 654994  | 747491     | 1.88E-03   | 390347      | 188235     | 340172      |             |
| Lower 95%                                                             | 731493  | 457831  | 84989   | 839679 | 467582  | 549457  | 600529     | 2.44E-07   | 348934      | 159632     | 296833      |             |
| Upper 95%                                                             | 1086056 | 544822  | 1012889 | 986221 | 549556  | 679243  | 778276     | 1.61E-02   | 399494      | 197304     | 350024      |             |
| Gene-flow 'Spotted_Gulf3' (AIC: 206273.5)                             |         |         |         |        |         |         |            |            |             |            |             |             |
| ANCSIZE                                                               | Mcho    | Mhen    | Mpun    | Mtre   | MpunPP  | MpunPS  | h_ps       | h_pp       | TDIV_pp_pu  | TDIV_ps_pp | TMIG_all    | MaxEstLhood |
| 1261108                                                               | 496572  | 852503  | 1001072 | 476782 | 562035  | 719469  | 2.90E-07   | 1.43E-08   | 399281      | 353866     | 313679      | -103125     |
| Gene-flow 'Spotted_Gulf4' (AIC: 206468.8)                             |         |         |         |        |         |         |            |            |             |            |             |             |
| ANCSIZE                                                               | Mcho    | Mhen    | Mpun    | Mtre   | MpunPP  | MpunPS  | h_ps       | TDIV_pp_pu | TDIV_ps_pp  | TMIG       | MaxEstLhood |             |
| 1367710                                                               | 545788  | 1106548 | 1013642 | 491120 | 930091  | 678935  | 4.70E-08   | 396569     | 350716      | 310918     | -103223     |             |
| Gene-flow 'Spotted_Gulf5' (AIC: 217858.7)                             |         |         |         |        |         |         |            |            |             |            |             |             |
| ANCSIZE                                                               | Mcho    | Mhen    | Mpun    | Mtre   | MpunPP  | MpunPS  | TINT       | h_ps       | TDIV_pp_pu  | TDIV_ps_pp | MaxEstLhood |             |
| 1023494                                                               | 545177  | 1561774 | 884752  | 500499 | 728827  | 1021    | 48         | 4.50E-07   | 317232      | 184253     | -108918     |             |
| Gene-flow 'Spotted_Gulf6' (AIC: 226553.7)                             |         |         |         |        |         |         |            |            |             |            |             |             |
| ANCSIZE                                                               | Mcho    | Mhen    | Mpun    | Mtre   | MpunPP  | MpunPS  | TINT       | h_ps       | h_pp        | TDIV_pp_pu | TDIV_ps_pp  | MaxEstLhood |
| 687106                                                                | 491289  | 1644752 | 822118  | 581868 | 161934  | 1165    | 49         | 5.40E-06   | 2.52E-05    | 220487     | 72464       | -113265     |
| Topology-geneflow 'Gulf-Texas1' (MaxObsLhood: -11573.4; AIC: 30115.9) |         |         |         |        |         |         |            |            |             |            |             |             |
| ANCSIZE                                                               | Mhen    | Mpun    | MpunPP  | MpunSN | MpunBZ  | Mtre    | TDIV_bz_tr | b_sn       | s_bz        | h_pp       | TDIV_pp_pu  | TDIV_sn_pu  |
| 480055                                                                | 584491  | 1016812 | 535016  | 588007 | 188070  | 272427  | 118657     | 3.02E-06   | 7.50E-07    | 2.08E-07   | 397440      | 303501      |
